# Supplementary material for: High-Performance Liquid Chromatography as a Novel Method for the Determination of α-Defensins in Synovial Fluid for Diagnosis of Orthopedic Infections
Source: PubMed Central journal article supplement (PMC7167866; doi:10.3390/diagnostics10010033), 2020-01-09
Supplement: diagnostics-10-00033-s001.pdf [file diagnostics-10-00033-s001.pdf]

**Figure S1:** Electrospray ionization mass spectrometry (ESI-MS) spectra of the human  $\alpha$ -defensins, HNP1, HNP2, and HNP3.

080819servisHR\_4 #60-66 RT: 1.59-1.75 AV: 7 SB: 24 0.04-0.39, 0.09-0.34 NL: 1.35E7  
T: FTMS + p ESI Full ms [200.00-2000.00]

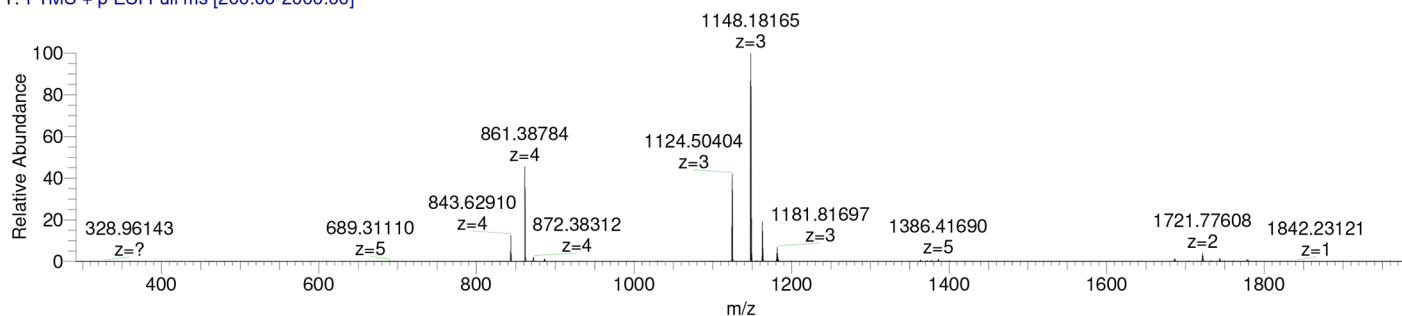

080819servisHR\_4 #60-66 RT: 1.59-1.75 AV: 7 SB: 24 0.04-0.39, 0.09-0.34 NL: 1.35E7  
T: FTMS + p ESI Full ms [200.00-2000.00]

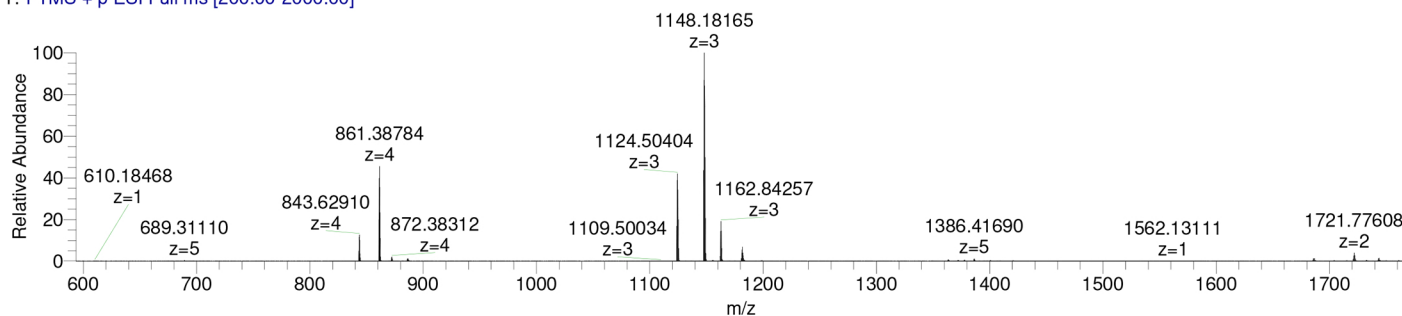

080819servisHR\_4 #60-66 RT: 1.59-1.75 AV: 7 SB: 24 0.04-0.39, 0.09-0.34 NL: 1.35E7  
T: FTMS + p ESI Full ms [200.00-2000.00]

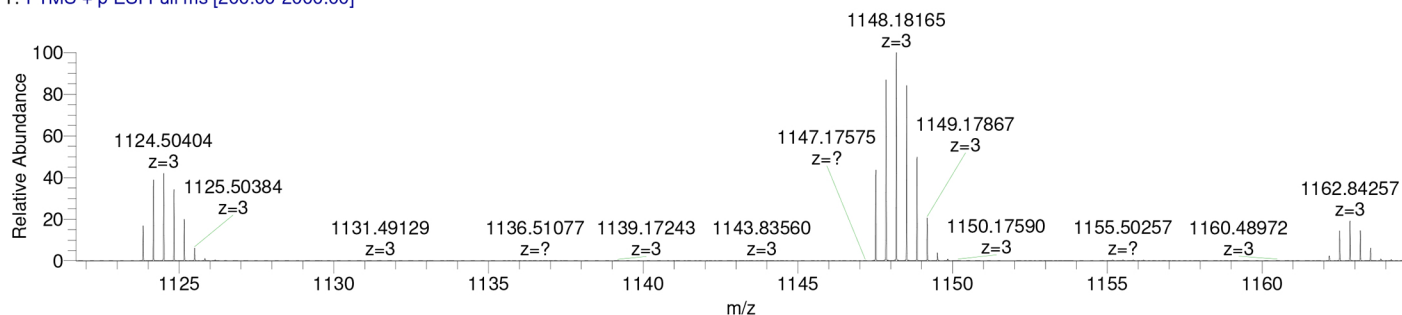

080819servisHR\_4 XT\_00001\_M\_190808161934 #2 RT: 2.00 AV: 1 SB: 2 1.00, 1.00 NL: 2.35E7  
T: FTMS + p ESI Full ms [200.00-2000.00]

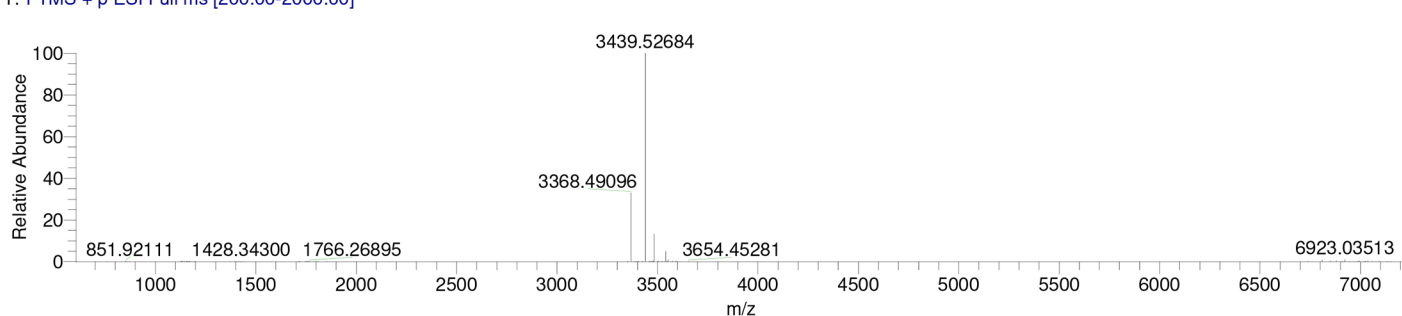

080819servisHR\_4 XT\_00001\_M\_190808161934 #2 RT: 2.00 AV: 1 SB: 2 1.00, 1.00 NL: 2.35E7  
T: FTMS + p ESI Full ms [200.00-2000.00]

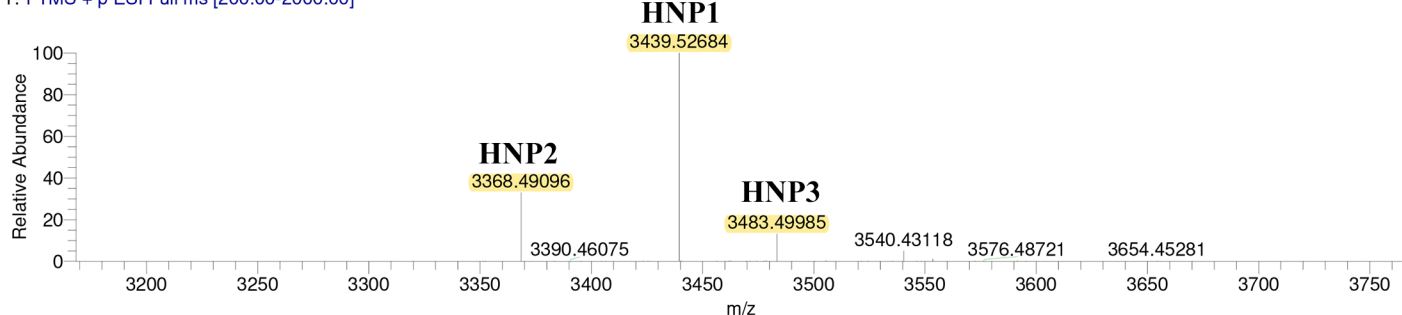

**Table S1:**  $\alpha$ -Defensins (HNP1-3) concentrations obtained by HPLC measurements in patients with various diagnoses.

| Patient | $\alpha$ -defensin (HNP1-3) concentrations (mg/L) |      |       |      |       |       |
|---------|---------------------------------------------------|------|-------|------|-------|-------|
|         | PJI                                               | TEP  | IA    | AR   | REA   | RHA   |
| 1       | 234.5                                             | 38   | 115   | 0.0  | 0.0   | 28.5  |
| 2       | 232                                               | 0.0  | 150   | 0.0  | 45    | 0.0   |
| 3       | 356                                               | 0.0  | 99.5  | 0.0  | 0.0   | 201   |
| 4       | 75.5                                              | 0.0  | 14.5  | 0.0  | 0.0   | 0.0   |
| 5       | 80                                                | 13.5 | 2042  | 0.0  | 47    | 0.0   |
| 6       | 36.5                                              | 37   | 677.5 | 0.0  | 0.0   | 0.0   |
| 7       | 653                                               | 0.0  | 133.5 | 0.0  | 61    | 0.0   |
| 8       | 388.5                                             | 0.0  | 328   | 0.0  | 23    | 37.4  |
| 9       | 965.5                                             | 13.5 | 186   | 0.0  | 116.5 | 191.5 |
| 10      | 468.5                                             | 0.0  | 174   | 13.5 | 96    | 73    |
| 11      | 295.5                                             | 29.5 | 454   | 7.5  | 19.5  | 67    |
| 12      | 110                                               | 38   | 109   | 26   | 103.5 | 59    |
| 13      | 93                                                | 16   | 135.5 | 0.0  | 7     | 68.5  |
| 14      | 138.0                                             | 0.0  | 113.5 | 0.0  | 58    | 345.5 |
| 15      | 162.5                                             | 0.0  | 1272  | 0.0  | 0.0   | 128.5 |
| 16      | 267                                               | 0.0  | 2635  | 0.0  | 160.5 | 0.0   |
| 17      | 282                                               | 0.0  | 277   | 0.0  | 108   | 47    |
| 18      | 706                                               | 0.0  | 323.5 | 23.5 | 58.5  | 168.5 |
| 19      |                                                   | 0.0  | 348.5 | 0.0  | 72    | 53.5  |
| 20      |                                                   | 0.0  | 377.5 | 0.0  |       | 11.5  |
| 21      |                                                   | 7.5  | 470.5 | 0.0  |       | 46    |
| 22      |                                                   | 0.0  | 477   | 0.0  |       | 87    |
| 23      |                                                   | 0.0  | 238.5 | 0.0  |       | 35    |
| 24      |                                                   | 26.0 | 284.5 | 0.0  |       | 40.5  |
| 25      |                                                   | 0.0  | 591.5 | 0.0  |       | 8.5   |
| 26      |                                                   | 9    | 464.5 | 0.0  |       | 61    |
| 27      |                                                   |      | 343.5 | 7.0  |       | 24    |
| 28      |                                                   |      | 398.5 | 0.0  |       | 62    |
| 29      |                                                   |      | 282.5 | 0.0  |       | 565.5 |
| 30      |                                                   |      | 158   | 0.0  |       |       |
| 31      |                                                   |      | 355.5 | 0.0  |       |       |
| 32      |                                                   |      | 225.0 |      |       |       |
| 33      |                                                   |      | 493   |      |       |       |
| 34      |                                                   |      | 296   |      |       |       |

AR = arthrosis, IA = infectious arthritis, PJI = periprosthetic joint infections, REA = reactive arthritis, RHA = rheumatoid arthritis, TEP = total endoprosthesis.
